# Supplementary material for: Lanthanide coordination polymer-based biosensor for citrate detection in urine
Source: Royal Society of Chemistry journal article supplement (doi:10.1039/c8ay02694g), 2019-01-01
Supplement: c8ay02694g1.pdf [file c8ay02694g1.pdf]

## Electronic Supplementary Information

### Lanthanide Coordination Polymer Based Biosensor for Citrate Detection in Urine

Haoshuang Shen<sup>a,b</sup>, Baoxia Liub<sup>b\*#</sup>, Daosheng Liu<sup>a</sup>, Xu Zhu<sup>b</sup>, Xiuhua Wei<sup>b</sup>,

Limin Yu<sup>b</sup>, Qi Shen<sup>c</sup>, Peng Qu<sup>b</sup>, Maotian Xu<sup>b</sup>

<sup>a</sup> College of Chemistry, Chemical Engineering and Environmental Engineering, Liaoning Shihua University, Liaoning 113001, P. R. China

<sup>b</sup> Henan Key Laboratory of Biomolecular Recognition and Sensing, College of Chemistry and Chemical Engineering, Shangqiu Normal University, Shangqiu 476000, China

\*Corresponding author; Tel/fax: +86 370 2586802; E-mail: liubaoxia2005@163.com (B. L.).

<sup>c</sup> College of chemistry and Molecular Engineering, Zhengzhou University, Zhengzhou 450001, China

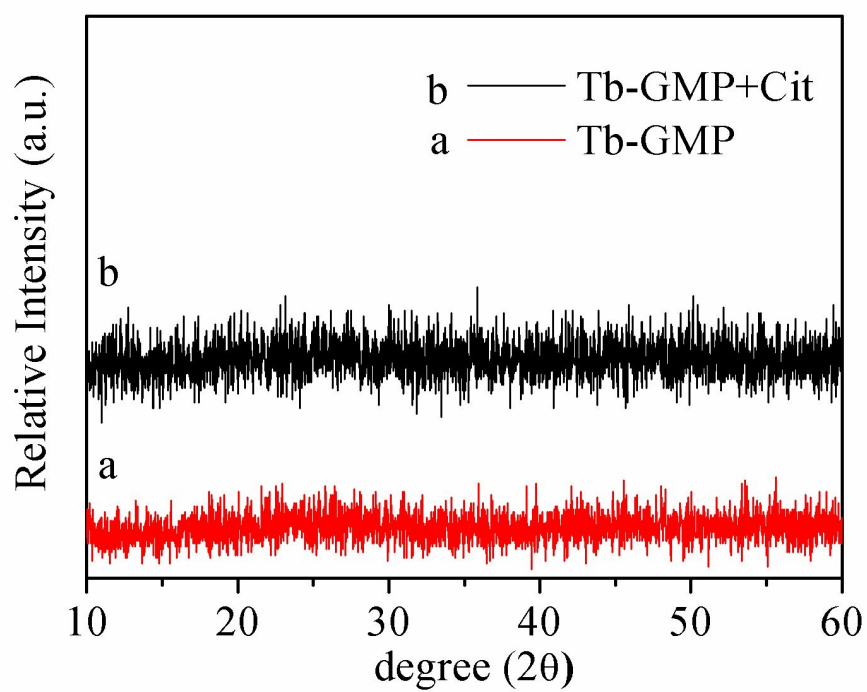

**Fig. S1** X-ray diffraction (XRD) spectra of Tb-GMP (a), Tb-GMP after the addition of Cit(b).

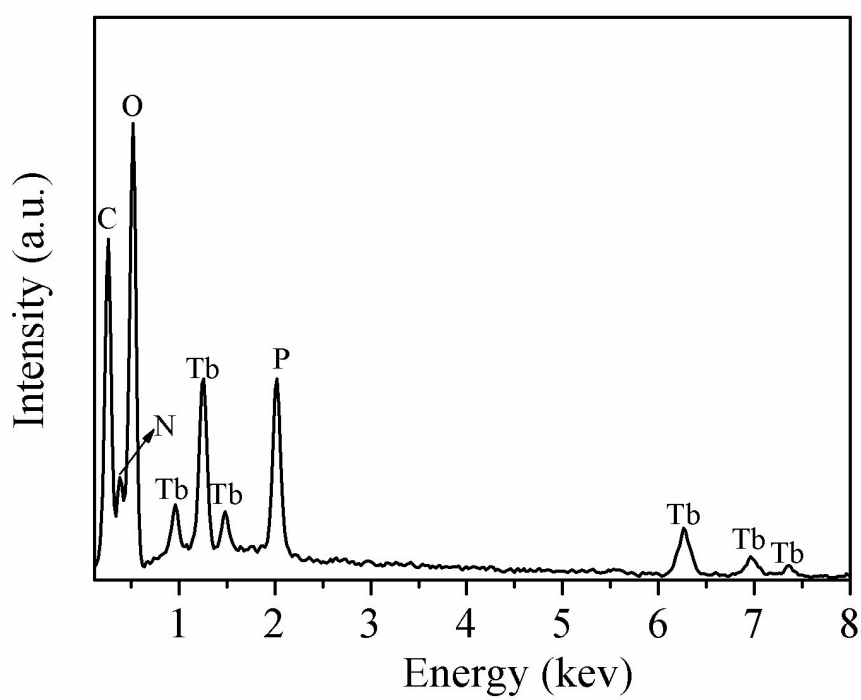

**Fig. S2** Energy-dispersive X-ray (EDX) spectra of Tb-GMP.

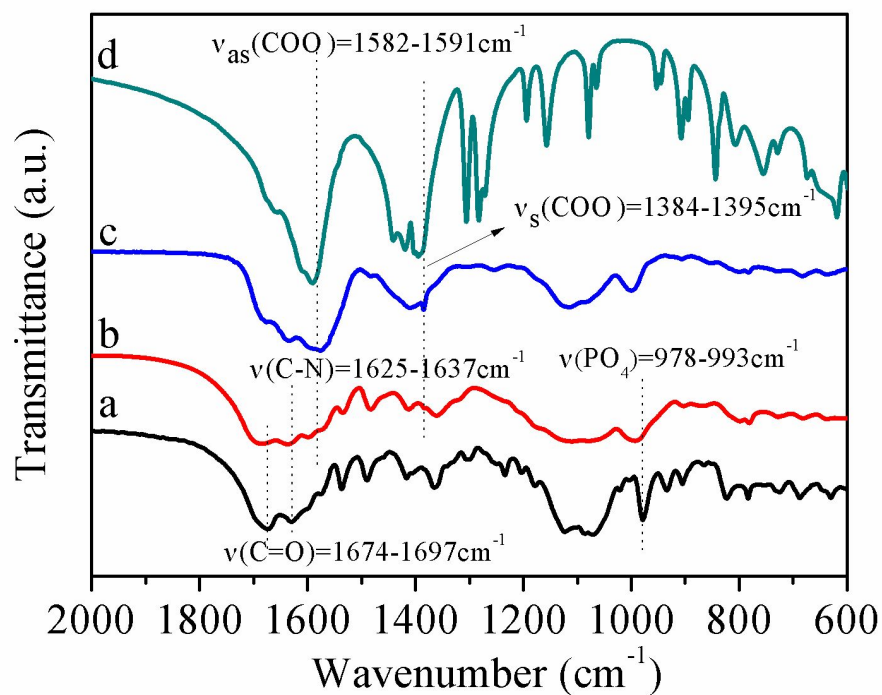

**Fig. S3** FTIR spectra of GMP (a), Tb-GMP (b), Tb-GMP after reacting with Cit (c), and pure Cit (d).  $\nu$ : stretching vibration;  $\nu_{\text{s}}$ : symmetrical stretching vibration;  $\nu_{\text{as}}$ : asymmetrical stretching vibration.

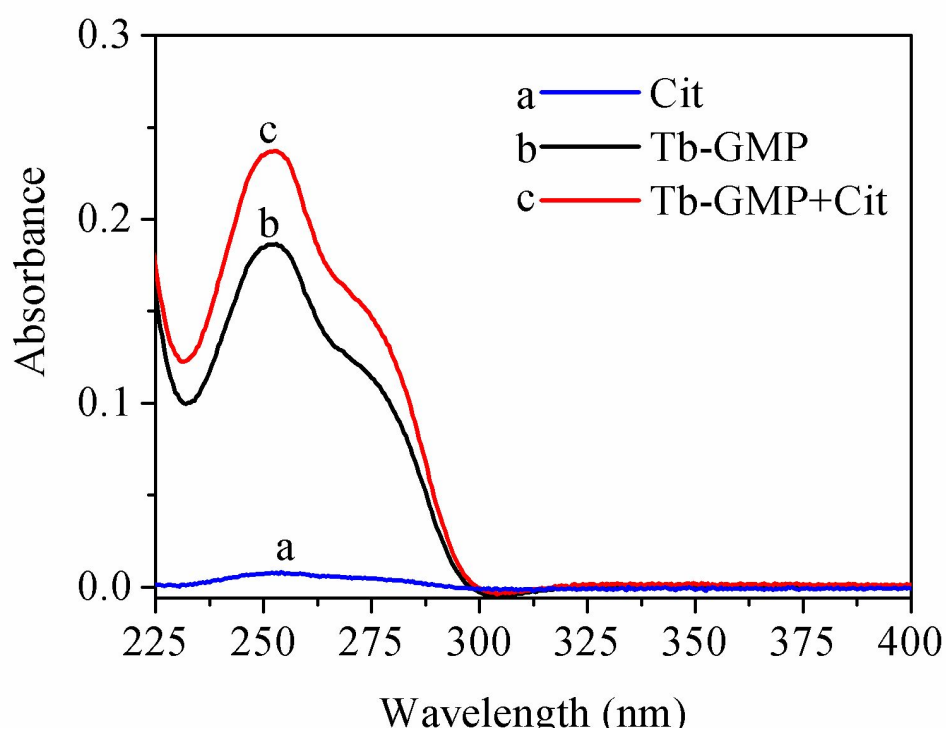

**Fig. S4** UV absorption spectra of Cit (a), Tb-GMP(b), Tb-GMP after the addition of Cit (c) in aqueous solution.

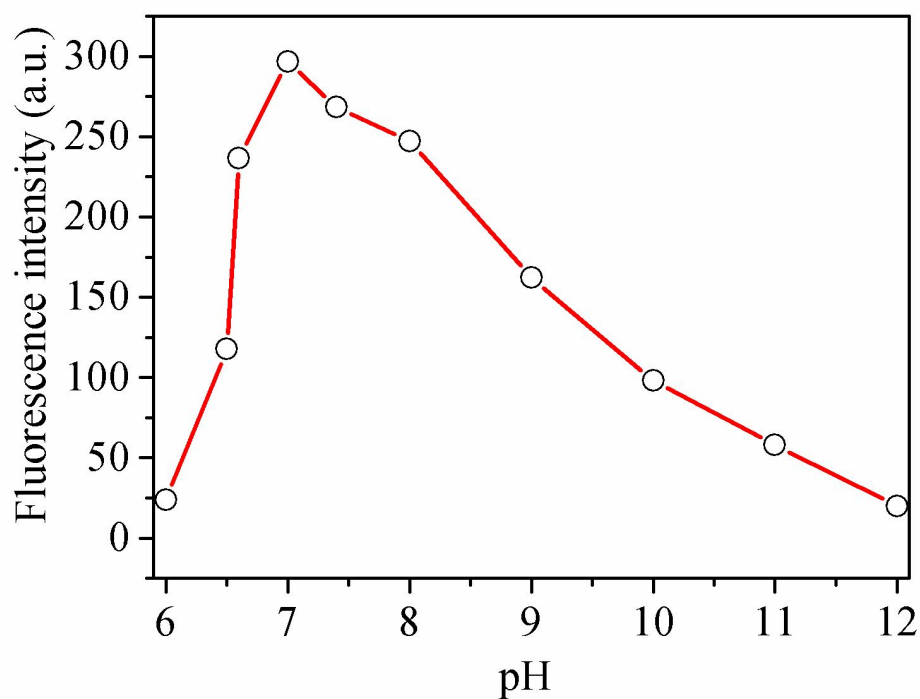

Fig. S5 Effect of pH on the fluorescence intensity of Tb-GMP after the addition of Cit.

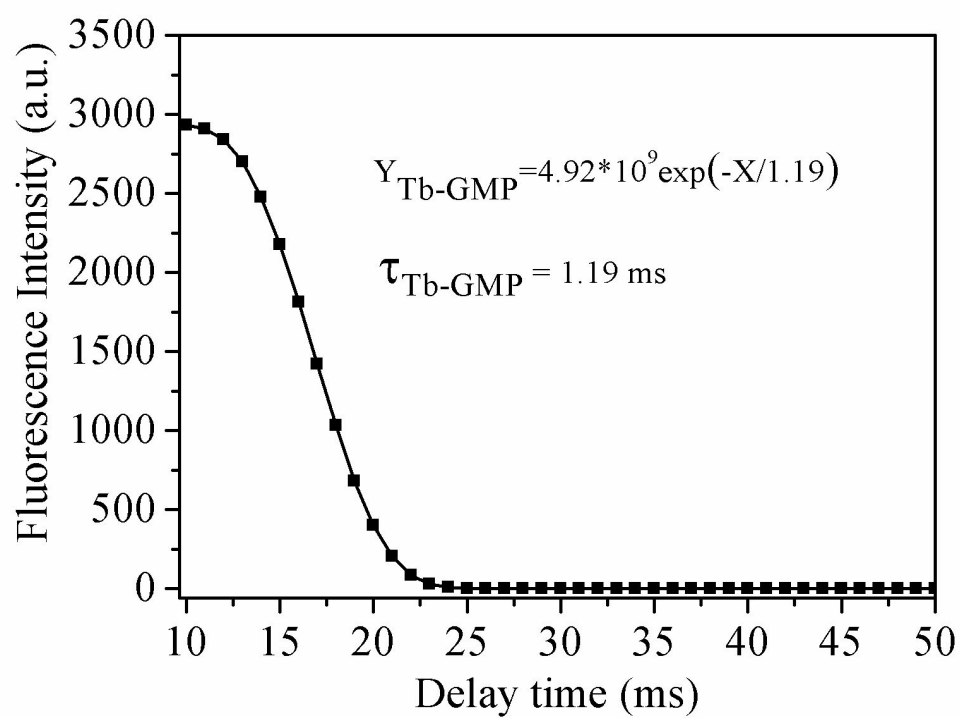

Fig. S6 Fluorescence lifetime of Tb-GMP

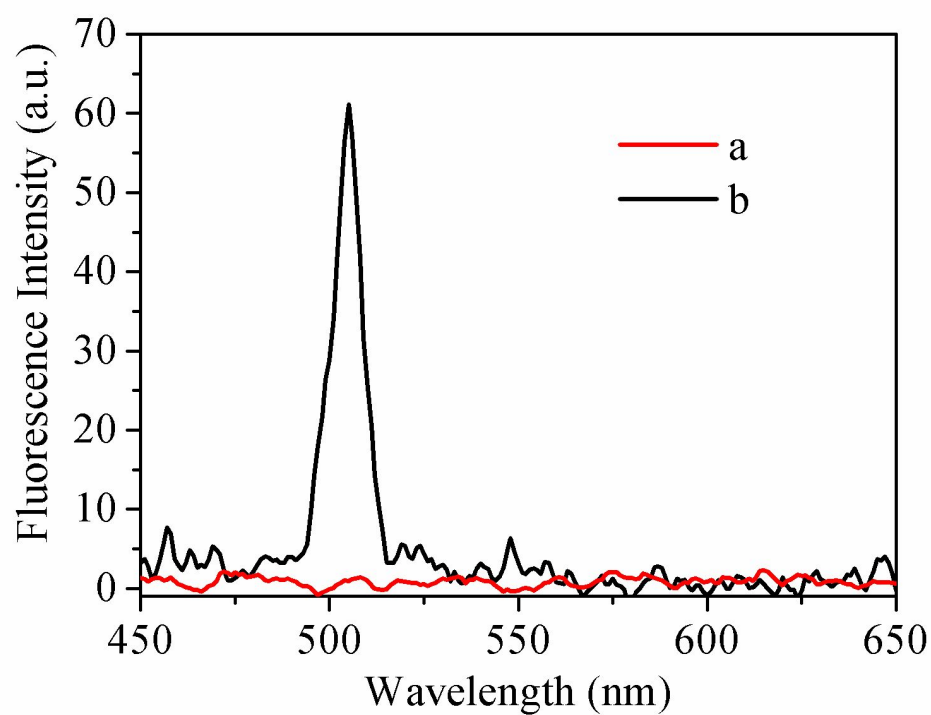

**Fig. S7** Fluorescence of urine under time-resolve fluorescence mode (a) and fluorescence mode (b).

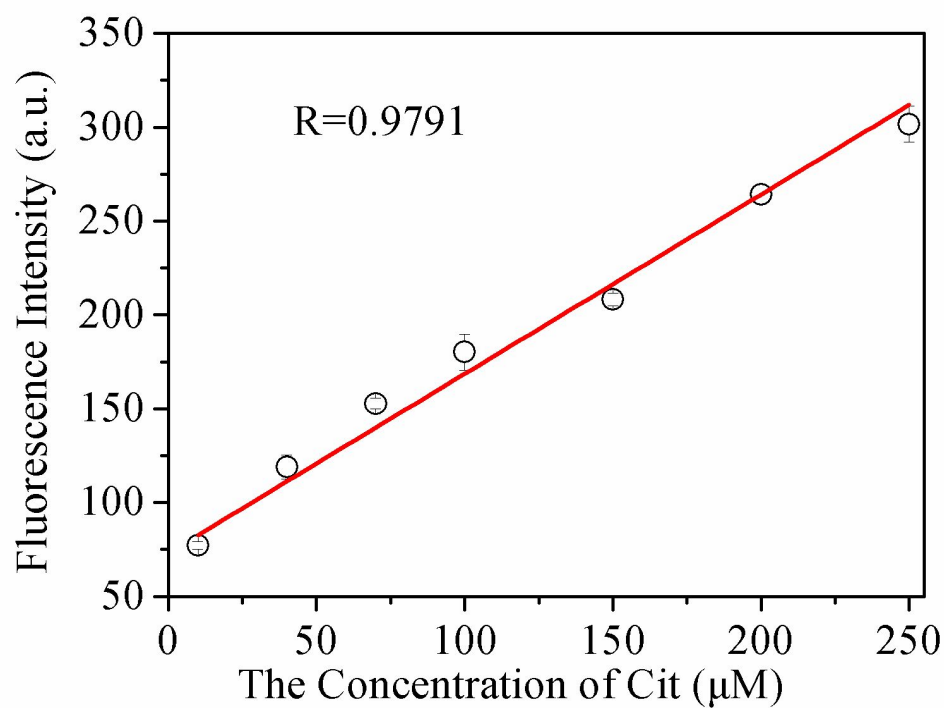

**Fig. S8** The linear relationship between the fluorescent intensity of Tb-GMP at 545 nm and the concentrations of Cit in urine sample.

**Table S1** Determination of Cit in urine sample based on time-resolved fluorescence.

| Samples | Spiked ( $\mu\text{M}$ ) | Detected ( $\mu\text{M}$ ) <sup>a</sup> | Recovery (%) |
|---------|--------------------------|-----------------------------------------|--------------|
| 1       | 30                       | $30.04 \pm 1.79$                        | 100.20       |
| 2       | 120                      | $111.11 \pm 5.55$                       | 92.59        |
| 3       | 200                      | $200.39 \pm 5.13$                       | 100.20       |

<sup>a</sup> Mean value ( $n = 3$ )  $\pm$  standard deviation.
